# Supplementary material for: Determinants of Pain-Induced Disability in German Women with Endometriosis during the COVID-19 Pandemic
Source: MDPI journal article supplement (doi:10.3390/ijerph19148277), 2022-07-06
Supplement: s1 [file s1]

**Supplementary Table S1. Differences between participants who did not complete (group “Non-respondents”) versus those who completed the PDI questionnaire (group “Respondents”).**

| Variables                                                                                                             | Values                                                            | Non-respondents                            | Respondents                                 | p-value            |
|-----------------------------------------------------------------------------------------------------------------------|-------------------------------------------------------------------|--------------------------------------------|---------------------------------------------|--------------------|
| Demographic variables                                                                                                 |                                                                   |                                            |                                             |                    |
| Age                                                                                                                   | M (SD); N<br>Mdn (IQR)                                            | 32.45 (6.92); 116<br>32.00 (27.00 – 36.00) | 31.94 (7.10); 277<br>31.00 (26.00 – 36.00)  | 0.493 <sup>2</sup> |
| Having a stable relationship                                                                                          | No in % (n/N)<br>Yes in % (n/N)                                   | 70.6% (72/102)<br>29.4% (30/102)           | 78.3% (217/277)<br>21.7% (60/277)           | 0.116 <sup>1</sup> |
| Living alone                                                                                                          | No in % (n/N)<br>Yes in % (n/N)                                   | 73.5% (86/117)<br>26.5% (31/117)           | 80.1% (221/276)<br>19.9% (55/276)           | 0.150 <sup>1</sup> |
| Educational level                                                                                                     | Up to secondary level in % (n/N)<br>Tertiary level in % (n/N)     | 20% (1/5)<br>80% (4/5)                     | 29.5% (78/264)<br>70.5% (186/264)           | 0.999 <sup>3</sup> |
| Pandemic-specific variables                                                                                           |                                                                   |                                            |                                             |                    |
| Duration of i/q                                                                                                       | <15d in % (n/N)<br>≥15d in % (n/N)                                | 15.8% (16/101)<br>82.4% (85/101)           | 10.5% (29/277)<br>89.5% (248/277)           | 0.154 <sup>1</sup> |
| Being in i/q                                                                                                          | No in % (n/N)<br>Yes in % (n/N)                                   | 6.0% (7/116)<br>94.0% (109/116)            | 2.5% (7/277)<br>97.5% (270/277)             | 0.087 <sup>1</sup> |
| Reduction in social network                                                                                           | No to moderate reduction in % (n/N)<br>Large reduction in % (n/N) | 31.4% ((32/102)<br>68.6% (70/102)          | 27.4% (76/277)<br>72.6% (201/277)           | 0.452 <sup>1</sup> |
| Perceived reduction in social support regarding pain experience during social isolation (by partner/ family/ friends) | No in % (n/N)<br>Yes in % (n/N)                                   | 75.0% (3/4)<br>25.0% (1/4)                 | 61.2% (167/273)<br>38.8% (106/273)          | 0.573 <sup>1</sup> |
| Endometriosis-specific variables                                                                                      |                                                                   |                                            |                                             |                    |
| Time since diagnosis (y)                                                                                              | M (SD); N<br>Mdn (IQR)                                            | 3.94 (4.60); 95<br>2.00 (1.00 – 4.00)      | 4.42 (4.84); 276<br>3.00 (1.00 – 5.00)      | 0.289 <sup>2</sup> |
| Age at diagnosis (y)                                                                                                  | M (SD); N<br>Mdn (IQR)                                            | 28.51 (6.77); 95<br>29.00 (24.00 – 33.00)  | 27.53 (6.22); 276<br>27.00 (23.00 – 32.50)  | 0.116 <sup>2</sup> |
| Time since pain onset (y)                                                                                             | M (SD); N<br>Mdn (IQR)                                            | 13.23 (7.63); 97<br>12.00 (7.00 – 18.00)   | 14.02 (7.86); 277<br>13.00 (8.00 – 20.00)   | 0.397 <sup>2</sup> |
| Diagnostic delay (y)                                                                                                  | M (SD); N<br>Mdn (IQR)                                            | 9.39 (6.96); 95<br>9.00 (4.00 – 14.00)     | 9.63 (6.88); 276<br>9.00 (4.50 – 14.00)     | 0.920 <sup>2</sup> |
| Pain characteristics                                                                                                  | Pain peaks in % (n/N)<br>Continuous pain in % (n/N)               | 66.7% (64/96)<br>33.3% (32/96)             | 64.3% (178/277)<br>35.7% (99/277)           | 0.670 <sup>1</sup> |
| Number of pain localizations                                                                                          | M (SD); N<br>Mdn (IQR)                                            | 5.00 (1.12), 39<br>5.00 (4.00 – 6.00)      | 5.08 (1.16), 276<br>5.00 (5.00 – 6.00)      | 0.580 <sup>2</sup> |
| Pain intensity                                                                                                        |                                                                   |                                            |                                             |                    |
| Dysmenorrhoea prior to i/q                                                                                            | M (SD); N<br>Mdn (IQR)                                            | 63.50 (33.98), 34<br>72.50 (49.00 – 96.00) | 65.25 (30.99), 250<br>73.50 (46.00 – 90.00) | 0.915 <sup>2</sup> |
| Non-cyclical pain prior to i/q                                                                                        | M (SD); N<br>Median (IQR)                                         | 49.61 (30.33), 38<br>46.50 (26.00 – 74.00) | 51.31 (26.83), 265<br>51.00 (31.00 – 72.00) | 0.681 <sup>2</sup> |
| Dyspareunia prior to i/q                                                                                              | M (SD); N<br>Mdn (IQR)                                            | 39.80 (32.16), 30<br>32.00 (11.00 – 59.00) | 45.00 (32.65), 254<br>45.50 (14.00 – 69.00) | 0.447 <sup>2</sup> |

|                                       |                        |                                            |                                              |                    |
|---------------------------------------|------------------------|--------------------------------------------|----------------------------------------------|--------------------|
| Dysuria prior i/q                     | M (SD); N<br>Mdn (IQR) | 30.30 (32.67), 33<br>11.00 (4.00 – 48.00)  | 28.50 (28.92), 246<br>19.00 (3.00 – 48.00)   | 0.914 <sup>2</sup> |
| Dyschezia prior to i/q                | M (SD); N<br>Mdn (IQR) | 46.14 (31.73), 35<br>48.00 (18.00 – 75.00) | 39.76 (30.94), 258<br>34.00 (12.00 – 66.00)  | 0.257 <sup>2</sup> |
| Lower back pain prior to i/q          | M (SD); N<br>Mdn (IQR) | 57.14 (33.37), 37<br>63.00 (33.00 – 90.00) | 57.37 (32.30), 270<br>59.00 (33.00 – 87.00)  | 0.896 <sup>2</sup> |
| Global pain prior to i/q              | M (SD); N<br>Mdn (IQR) | 46.09 (20.02), 26<br>46.92 30.17 – 59.83)  | 47.29 (19.25), 211<br>47.50 (31.83 – 61.17)  | 0.654 <sup>2</sup> |
| Current dysmenorrhoea                 | M (SD); N<br>Mdn (IQR) | 28.67 (49.65), 3<br>0.00 (0.00 – 86.00)    | 60.19 (33.57), 254<br>69.50 ( 30.00 – 87.00) | 0.160 <sup>2</sup> |
| Current non-cyclical pain             | M (SD); N<br>Mdn (IQR) | 55.29 (34.86), 7<br>37.00 (24.00 – 92.00)  | 52.40 (30.25), 267<br>56.00 (27.00 – 77.00)  | 0.776 <sup>2</sup> |
| Current dyspareunia                   | M (SD); N<br>Mdn (IQR) | 35.33 (43.56), 3<br>22.00 (0.00 – 84.00)   | 44.14 (35.43), 254<br>45.00 (8.00 – 73.00)   | 0.611 <sup>2</sup> |
| Current dysuria                       | M (SD); N<br>Mdn (IQR) | 32.83 (35.63), 6<br>28.00 (1.00 – 50.00)   | 29.09 (30.93), 250<br>16.00 (2.00 – 51.00)   | 0.856 <sup>2</sup> |
| Current dyschezia                     | M (SD); N<br>Mdn (IQR) | 65.33 (25.49), 6<br>70.00 (48.00 – 87.00)  | 39.56 (32.31), 255<br>36.00 (9.00 – 66.00)   | 0.054 <sup>2</sup> |
| Current lower back pain               | M (SD); N<br>Mdn (IQR) | 44.50 (33.09), 6<br>41.50 (19.00 – 75.00)  | 58.71 (34.09), 265<br>64.00 (28.00 – 88.00)  | 0.270 <sup>2</sup> |
| Current global pain                   | M (SD); N<br>Mdn (IQR) | 49.67 (24.04), 2<br>49.67 (32.67 – 66.67)  | 46.51 (21.37), 223<br>45.83 (30.17 – 62.33)  | 0.827 <sup>2</sup> |
| Pain-induced disability               |                        |                                            |                                              |                    |
| Family prior to i/q                   | M (SD); N<br>Mdn (IQR) | 5.84 (2.35), 37<br>6.00 (5.00 – 8.00)      | 5.11 (2.48), 277<br>5.00 (3.00 – 7.00)       | 0.095 <sup>2</sup> |
| Recreational prior to i/q             | M (SD); N<br>Mdn (IQR) | 5.84 (2.59), 37<br>7.00 (4.00 – 8.00)      | 5.56 (2.56), 277<br>6.00 (4.00 – 8.00)       | 0.468 <sup>2</sup> |
| Social activities prior to i/q        | M (SD); N<br>Mdn (IQR) | 5.95 (2.81), 37<br>6.00 (4.00 – 8.00)      | 5.41 (2.73), 277<br>6.00 (3.00 – 8.00)       | 0.237 <sup>2</sup> |
| Occupational prior to i/q             | M (SD); N<br>Mdn (IQR) | 6.54 (2.56), 37<br>7.00 (4.00 – 8.00)      | 5.96 (2.81), 277<br>6.00 (4.00 – 8.00)       | 0.286 <sup>2</sup> |
| Sexuality prior to i/q                | M (SD); N<br>Mdn (IQR) | 5.77 (3.44), 35<br>6.00 (3.00 – 9.00)      | 6.05 (3.24), 274<br>7.00 (3.00 – 9.00)       | 0.692 <sup>2</sup> |
| Self-care prior to i/q                | M (SD); N<br>Mdn (IQR) | 2.70 (3.19), 37<br>1.00 (0.00 – 5.00)      | 2.74 (2.77), 277<br>2.00 (0.00 – 5.00)       | 0.562 <sup>2</sup> |
| Life support prior to i/q             | M (SD); N<br>Mdn (IQR) | 2.73 (2.88), 37<br>2.00 (0.00 – 5.00)      | 2.67 (2.62), 277<br>2.00 (0.00 – 5.00)       | 0.841 <sup>2</sup> |
| Discretionary activities prior to i/q | M (SD); N<br>Mdn (IQR) | 29.80 (11.56), 35<br>31.00 (23.00 – 38.00) | 28.07 (11.06), 274<br>29.50 (11.06 – 37.00)  | 0.340 <sup>2</sup> |
| Basic activities prior to i/q         | M (SD)<br>Mdn (IQR)    | 5.43 (5.64), 35<br>4.00 (0.00 – 9.00)      | 5.42 (4.85), 274<br>4.00 (1.00 – 9.00)       | 0.628 <sup>2</sup> |
| Global PDI prior to i/q               | M (SD); N<br>Mdn (IQR) | 35.23 (15.64), 35<br>36.00 (26.00 – 46.00) | 33.4 (14.19), 274<br>34.00 (23.00 – 43.00)   | 0.560 <sup>2</sup> |
| Current family activities             | M (SD); N<br>Mdn (IQR) | 4.00 (3.16), 5<br>4.00 (2.00 – 6.00)       | 5.33 (2.69), 277<br>5.00 (3.00 – 8.00)       | 0.321 <sup>2</sup> |
| Current recreational activities       | M (SD); N<br>Mdn (IQR) | 3.80 (3.03), 5<br>3.00 (1.00 – 7.00)       | 5.34 (2.90), 277<br>6.00 (3.00 – 8.00)       | 0.278 <sup>2</sup> |
| Current social activities             | M (SD); N<br>Mdn (IQR) | 1.75 (2.87), 4<br>0.50 (0.00 – 3.50)       | 4.53 (3.43), 277<br>5.00 (1.00 – 8.00)       | 0.112 <sup>2</sup> |
| Current occupational activities       | M (SD); N<br>Mdn (IQR) | 3.25 (3.59), 4<br>2.50 (0.50 – 6.00)       | 5.30 (3.26), 277<br>5.00 (3.00 – 8.00)       | 0.216 <sup>2</sup> |
| Current sexuality                     | M (SD); N<br>Mdn (IQR) | 0.00 (0.00), 1<br>0.00 (0.00 – 0.00)       | 5.54 (3.48), 277<br>6.00 (3.00 – 9.00)       | 0.144 <sup>2</sup> |

|                                  |                        |                                      |                                             |                          |
|----------------------------------|------------------------|--------------------------------------|---------------------------------------------|--------------------------|
| Current self-care                | M (SD); N<br>Mdn (IQR) | 0.40 (0.89), 5<br>0.00 (0.00 – 0.00) | 2.87 (2.84), 277<br>2.00 (0.00 – 5.00)      | <b>0.025<sup>2</sup></b> |
| Current life support             | M (SD); N<br>Mdn (IQR) | 1.20 (1.64), 5<br>1.00 (0.00 – 1.00) | 2.69 (2.79), 277<br>2.00 (0.00 – 5.00)      | 0.282 <sup>2</sup>       |
| Current discretionary activities | M (SD); N<br>Mdn (IQR) | n.a.<br>n.a.                         | 26.05 (12.54), 277<br>26.00 (16.00 – 36.00) | n.a.                     |
| Current basic activities         | M (SD); N<br>Mdn (IQR) | n.a.<br>n.a.                         | 5.56 (5.12), 277<br>5.00 (1.00 – 9.00)      | n.a.                     |
| Current global PDI               | M (SD); N<br>Mdn (IQR) | n.a.<br>n.a.                         | 31.61 (15.82); 277<br>32.00 (19.00 – 43.00) | n.a.                     |
| Mental outcomes                  |                        |                                      |                                             |                          |
| PHQ-2                            | M (SD); N<br>Mdn (IQR) | 2.00 (2.35); 5<br>1.00 (1.00 – 2.00) | 2.84 (1.68); 269<br>2.00 (2.00 – 4.00)      | 0.163 <sup>2</sup>       |
| GAD-2                            | M (SD); N<br>Mdn (IQR) | 1.60 (1.52); 5<br>1.00 (1.00 – 2.00) | 2.91 (1.83); 269<br>2.00 (2.00 – 4.00)      | 0.092 <sup>2</sup>       |
| PHQ-4                            | M (SD); N<br>Mdn (IQR) | 3.60 (3.85); 5<br>2.00 (2.00 – 4.00) | 5.75 (3.19); 269<br>5.00 (3.00 – 8.00)      | 0.102 <sup>2</sup>       |
| BRS                              | M (SD); N<br>Mdn (IQR) | 2.30 (1.16); 6<br>2.25 (1.33 – 3.33) | 2.76 (0.82); 267<br>2.66 (2.16 – 3.33)      | 0.338 <sup>2</sup>       |

PDI = Pain Disability Index; BRS = Brief Resilience Scale; GAD-2 = Generalized Anxiety Disorder Scale; PHQ-2 = Patient Health Questionnaire for Depression; PHQ-4 = Patient Health Questionnaire for Depression and Anxiety; i/q =isolation or quarantine; d = days; N = Number of women for which data were available; n = sample size; M = mean; SD = standard deviation, Mdn = median; IQR = Interquartile Range; n.a.= not available/not applicable; y = years. Values in bold indicate statistical significance, as the level of statistical significance was set to  $p < 0.05$  (<sup>1</sup>=  $\chi^2$ -test; <sup>2</sup>= Mann-Whitney-U-test; <sup>3</sup>= Fisher exact test).
